# Supplementary material for: CXCR4 and a cell-extrinsic mechanism control immature B lymphocyte egress from bone marrow
Source: PubMed Central journal article supplement — J Exp Med. 2014 Dec 15;211(13):2567–81. doi: 10.1084/jem.20140457 (PMC4267240; doi:10.1084/jem.20140457), 2014-12-15
Supplement: supp_jem.20140457_JEM_20140457_sm.pdf [file supp_jem.20140457_JEM_20140457_sm.pdf]

## SUPPLEMENTAL MATERIAL

Beck et al., <http://www.jem.org/cgi/content/full/jem.20140457/>**Video 1. Intravital imaging of developing B cell migration before and after treatment with AMD3100 (25 min).**

Time-lapse image sequences (39- $\mu$ m-thick z stack) of BM calvaria showing developing B cells (GFP<sup>+</sup>, green). BM vasculature (red) is labeled using tetramethylrhodamine-conjugated dextran (molecular mass 2,000 kD) injected i.v. (left) Parenchymal immature B cells move in an amoeboid random walk fashion. (right)  $\sim$ 5 min after treatment with 80  $\mu$ g AMD3100, acute arrests of random walk of parenchymal immature B cells as well as a cell shape change from an amoeboid morphology to rounder cell morphology are shown. White boxes indicate regions of interest selected for higher magnification visualizations. Elapsed time is shown as hh:mm:ss. Data are representative of more than five independent experiments.

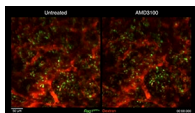**Video 2. Intravital imaging of *Cxcr4*-deficient developing B cell migration (30 min).**

Time-lapse image sequences (left, 39- $\mu$ m; right, 51- $\mu$ m z stack) of BM calvaria showing control developing B cells (GFP<sup>+</sup>, green). BM vasculature (red) is labeled using tetramethylrhodamine-conjugated dextran injected i.v. (left) WT developing B cells move in parenchyma in an amoeboid random walk fashion. (right) *Cxcr4*-deficient developing B cell random walk is slowed down and proximal to sinusoids, and cells have a more rounded morphology than control developing B cells. White boxes indicate regions of interest selected for higher magnification visualizations. Elapsed time is shown as hh:mm:ss. Data are representative of three independent experiments.

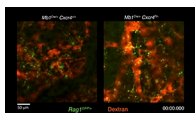**Video 3. Intravital imaging of *Cxcr4*-deficient developing B cell migration before and after treatment with AMD3100 (30 min).**

Time-lapse image sequences (51- $\mu$ m-thick z stack) of BM calvaria showing *Cxcr4*-deficient developing B cells (GFP<sup>+</sup>, green) before (left) and after (right) treatment with i.v. injection of 80  $\mu$ g AMD3100. BM vasculature (red) is labeled using tetramethylrhodamine-conjugated dextran injected i.v. (right)  $\sim$ 5 min after treatment with AMD3100, *Cxcr4*-deficient parenchymal immature B cell random walk is further arrested. White boxes indicate regions of interest selected for higher magnification visualizations. Elapsed time is shown as hh:mm:ss. Data are representative of three independent experiments.

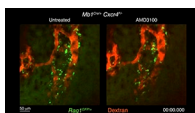**Video 4. Intravital imaging of developing B cell migration before and after treatment with anti-VCAM-1 (30 min).**

Time-lapse image sequences (51- $\mu$ m-thick z stack) of BM calvaria showing developing B cells (GFP<sup>+</sup>, green). BM vasculature (red) is labeled using tetramethylrhodamine-conjugated dextran injected i.v. (left) Parenchymal developing B cells move in an amoeboid random walk fashion. (right) 30 min after treatment with anti-VCAM-1 (M17/4 200  $\mu$ g), developing B cell random walk is arrested and a cell shape change from an amoeboid morphology to rounder cell morphology is seen. White boxes indicate regions of interest selected for higher magnification visualizations. Elapsed time is shown as hh:mm:ss. Data are representative of three independent experiments.

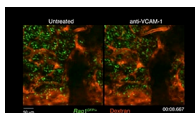**Video 5. Intravital imaging of *Itgb1*-deficient developing B cell migration (30 min).**

Time-lapse (30 min) image sequences (left, 39- $\mu$ m; right, 42- $\mu$ m z stack) of BM calvaria showing developing B cells (GFP<sup>+</sup>, green). BM vasculature (red) is labeled using tetramethylrhodamine-conjugated dextran injected i.v. (left) WT parenchymal immature B cells move in amoeboid random walk fashion. (right) *Itgb1*-deficient parenchymal B lineage cell random walk is slowed down and has rounder cell morphology than control parenchymal B lineage cells. White boxes indicate regions of interest selected for higher magnification visualizations. Elapsed time is shown as hh:mm:ss. Data are representative of three independent experiments.

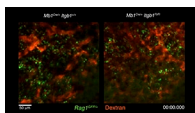

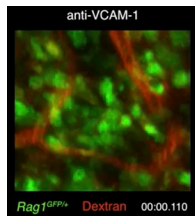

**Video 6. Intravital imaging of developing B cell migration before and after treatment with anti-VCAM-1 (30 min).** Time-lapse image sequences (51- $\mu\text{m}$ -thick z stack) of BM calvaria showing developing B cells (GFP<sup>+</sup>, green). BM vasculature (red) is labeled using tetramethylrhodamine-conjugated dextran injected i.v. After treatment with anti-VCAM-1 (M17/4), we zoomed in on an example of a rounded, nonamoeboid, developing B cell moving in the parenchyma for a period of 5 min, as noted by the white track. Elapsed time is shown as hh:mm:ss.

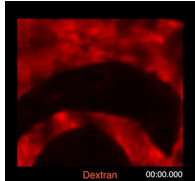

**Video 7. Intravital imaging of FITC-conjugated dextran perfusion into the BM parenchyma (29 min).** Time-lapse image sequence (42- $\mu\text{m}$ -thick z stack) of BM calvaria showing perfusion of FITC-conjugated dextran (molecular mass 500 kDa) during a period of 29 min into the parenchyma. Elapsed time is shown as hh:mm:ss.

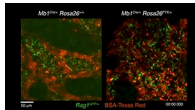

**Video 8. Intravital imaging of PTX-expressing B lineage cell migration in BM (30 min).** Time-lapse image sequences (39- $\mu\text{m}$ -thick z stack) of BM calvaria showing developing B cells (GFP<sup>+</sup>, green). BM vasculature (red) is labeled using BSA-Texas red injected i.v. (left) WT parenchymal developing B cells move in an amoeboid random walk fashion. (right) PTX parenchymal developing B cell random walk is arrested and has rounder cell morphology than control parenchymal developing B cells. White boxes indicate regions of interest selected for higher magnification visualizations. Elapsed time is shown as hh:mm:ss. Data are representative of four independent experiments.

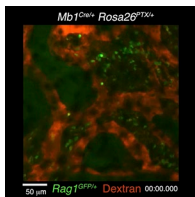

**Video 9. Intravital imaging of motile PTX-expressing B lineage cell migration in BM (30 min).** Time-lapse image sequence (39- $\mu\text{m}$ -thick z stack) of BM calvaria showing developing B cells (GFP<sup>+</sup>, green). BM vasculature (red) is labeled using tetramethylrhodamine-conjugated dextran injected i.v. Video is representative of 2 out of 13 areas imaged from four independent mice in which we observed a small fraction of motile developing B cells. Elapsed time is shown as hh:mm:ss.

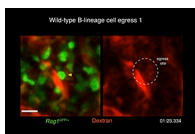

**Video 10. Intravital imaging of WT and PTX-expressing B lineage cell egress from BM.** Time-lapse image sequences of BM calvaria of *Rag1<sup>GFP/+</sup>* mice (first two examples) and of *Mb1<sup>Cre/+</sup> Rosa26<sup>PTX/+</sup>* mice showing developing B cells exiting into BM sinusoids (GFP<sup>+</sup>, green). BM vasculature (red) is labeled using tetramethylrhodamine-conjugated dextran injected i.v. The yellow arrowhead indicates a cell of interest. Elapsed time is shown as mm:ss.ms. Bar, 15  $\mu\text{m}$ .
